# Supplementary material for: The Killing of African Trypanosomes by Ethidium Bromide
Source: PubMed Central journal article supplement (PMC3002999; doi:10.1371/journal.ppat.1001226), 2010-12-16

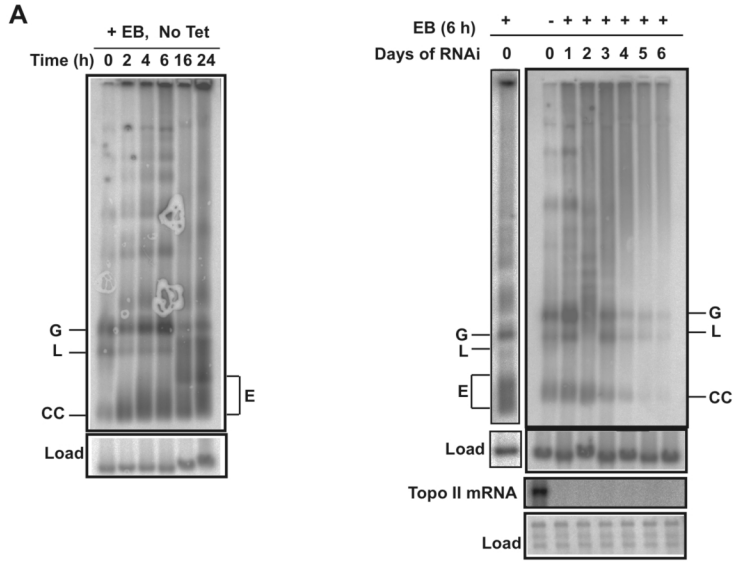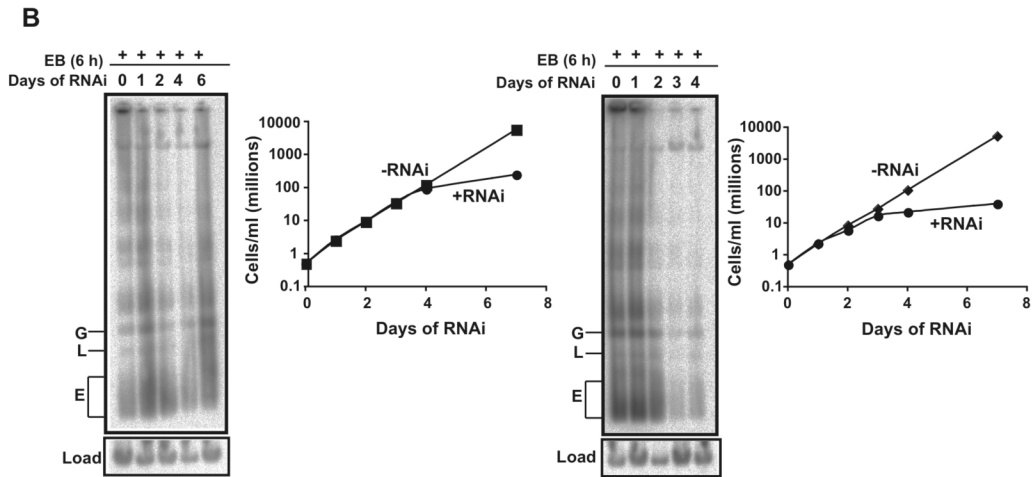

Supplement: ppat.1001226.s002.pdf [file ppat.1001226.s002.pdf]
