# Supplementary material for: The Killing of African Trypanosomes by Ethidium Bromide
Source: PubMed Central journal article supplement (PMC3002999; doi:10.1371/journal.ppat.1001226), 2010-12-16

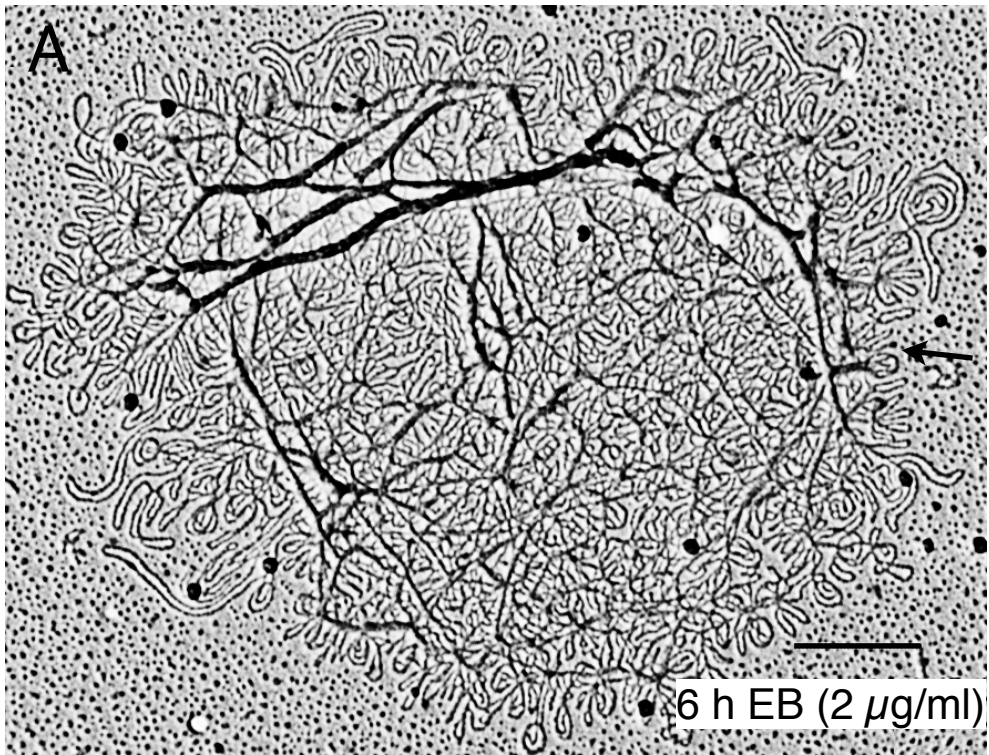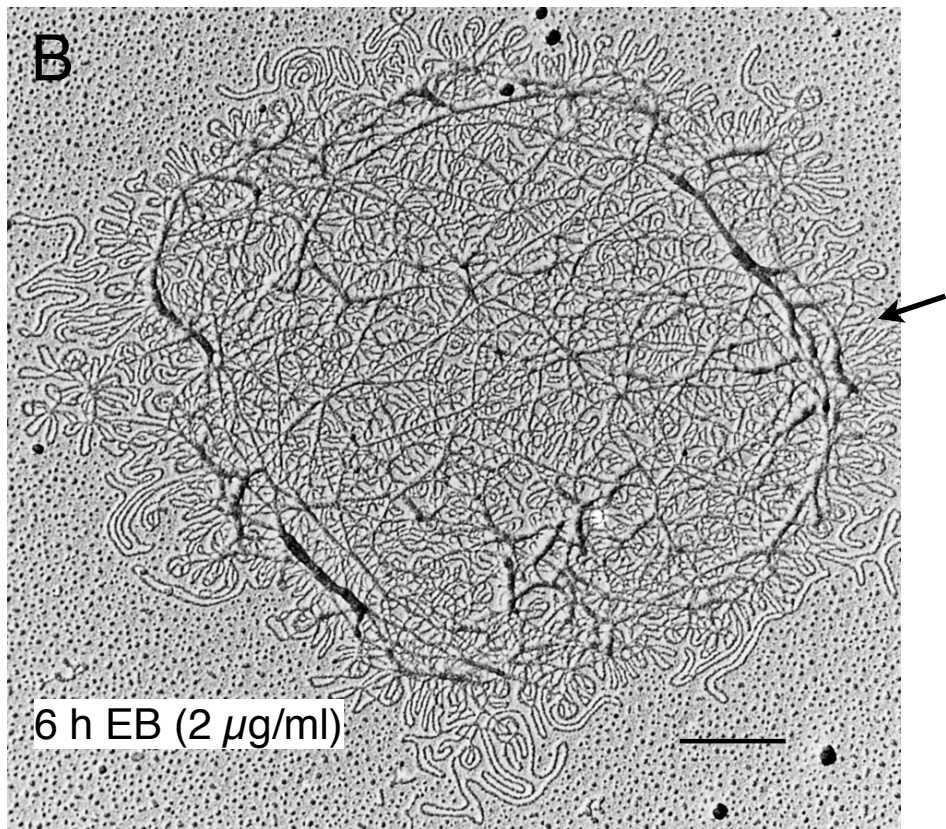

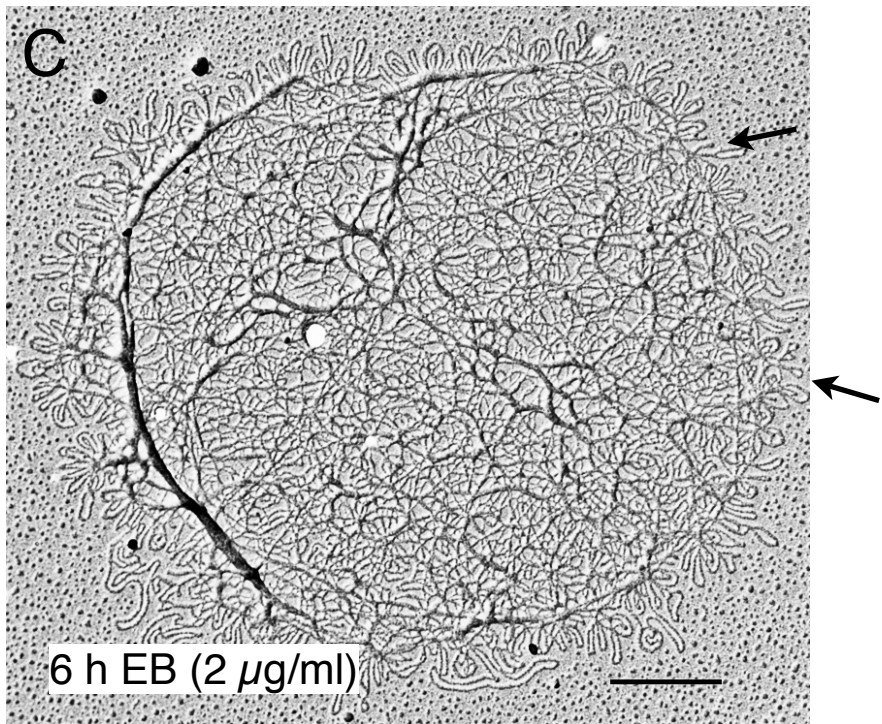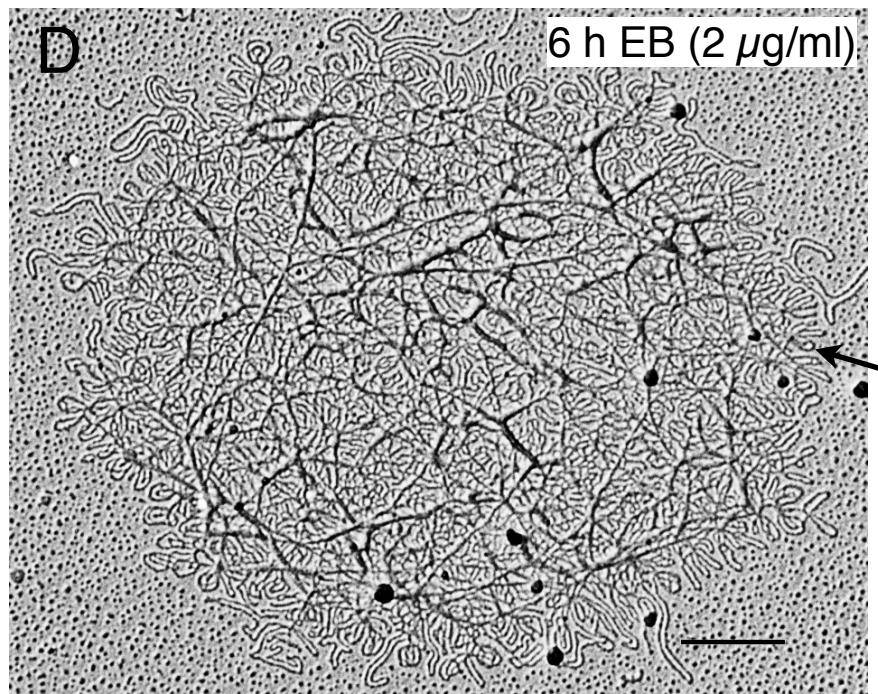

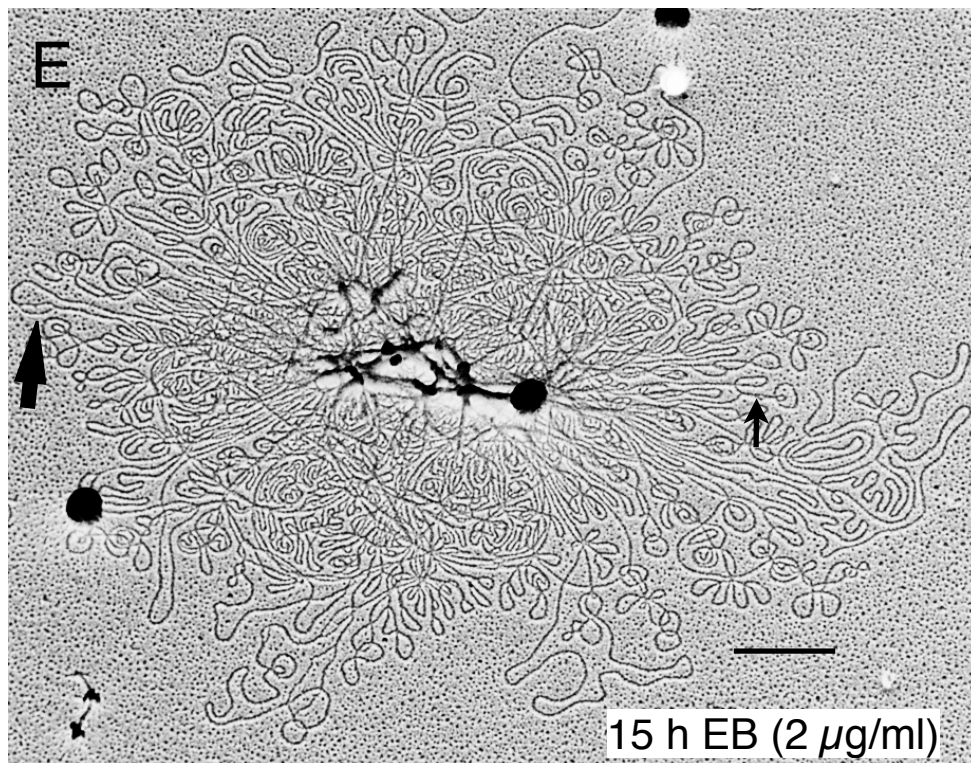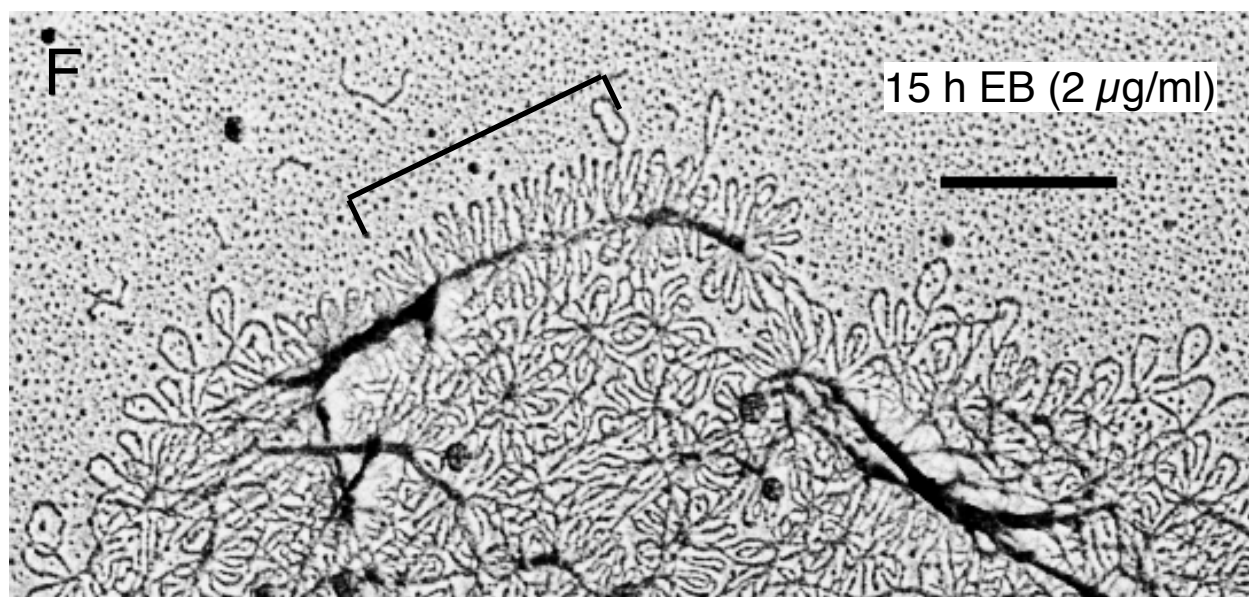

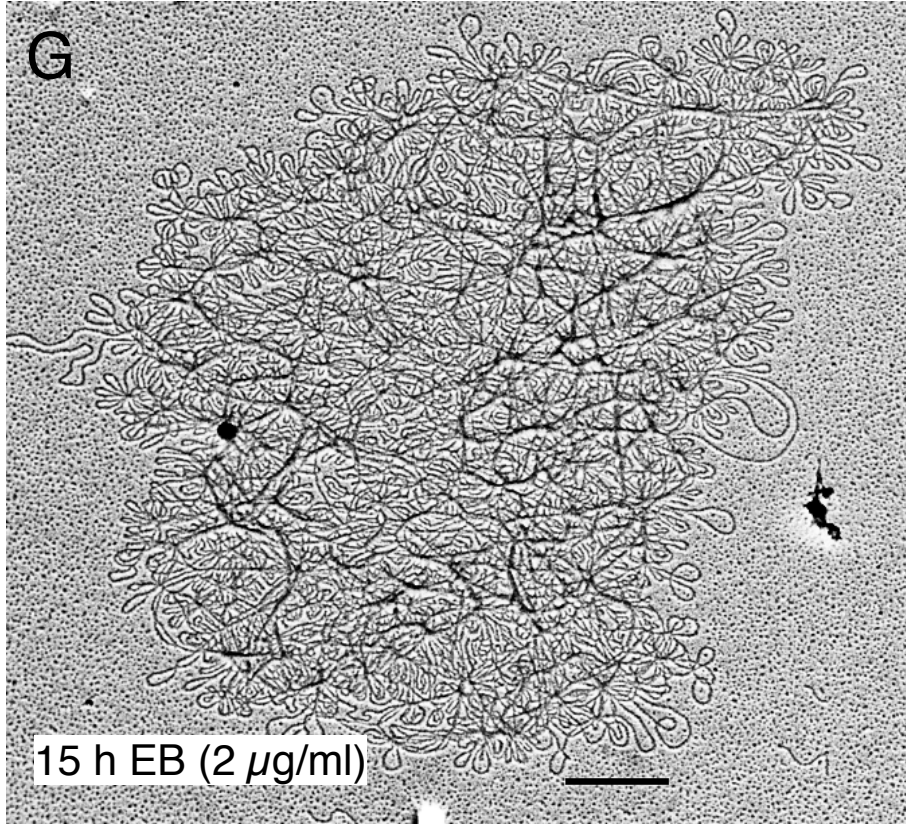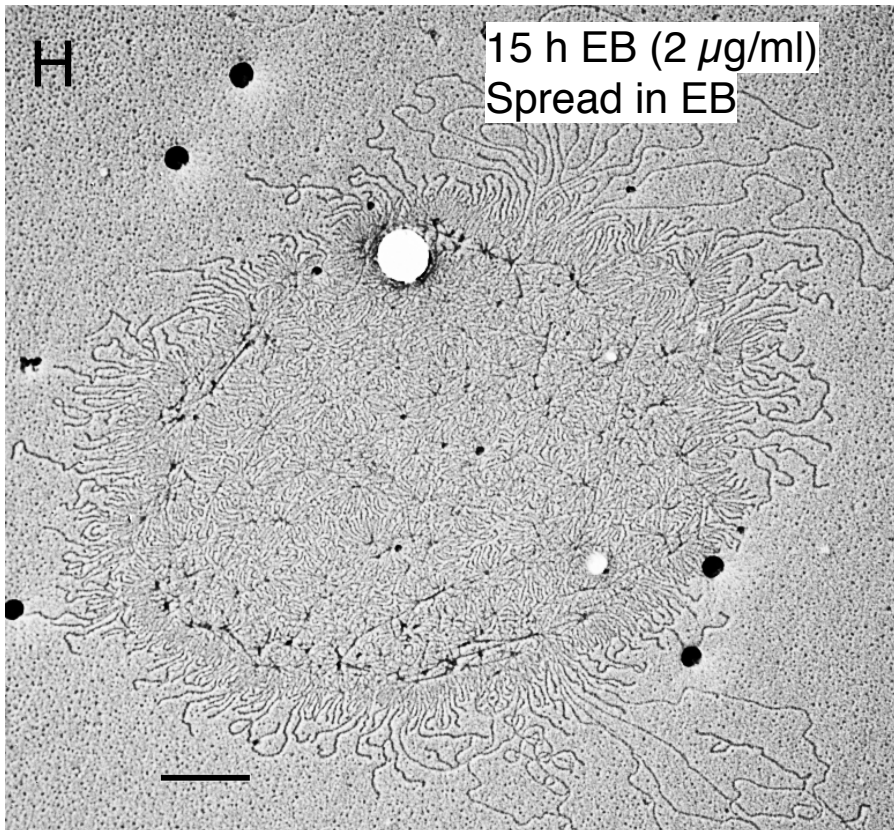

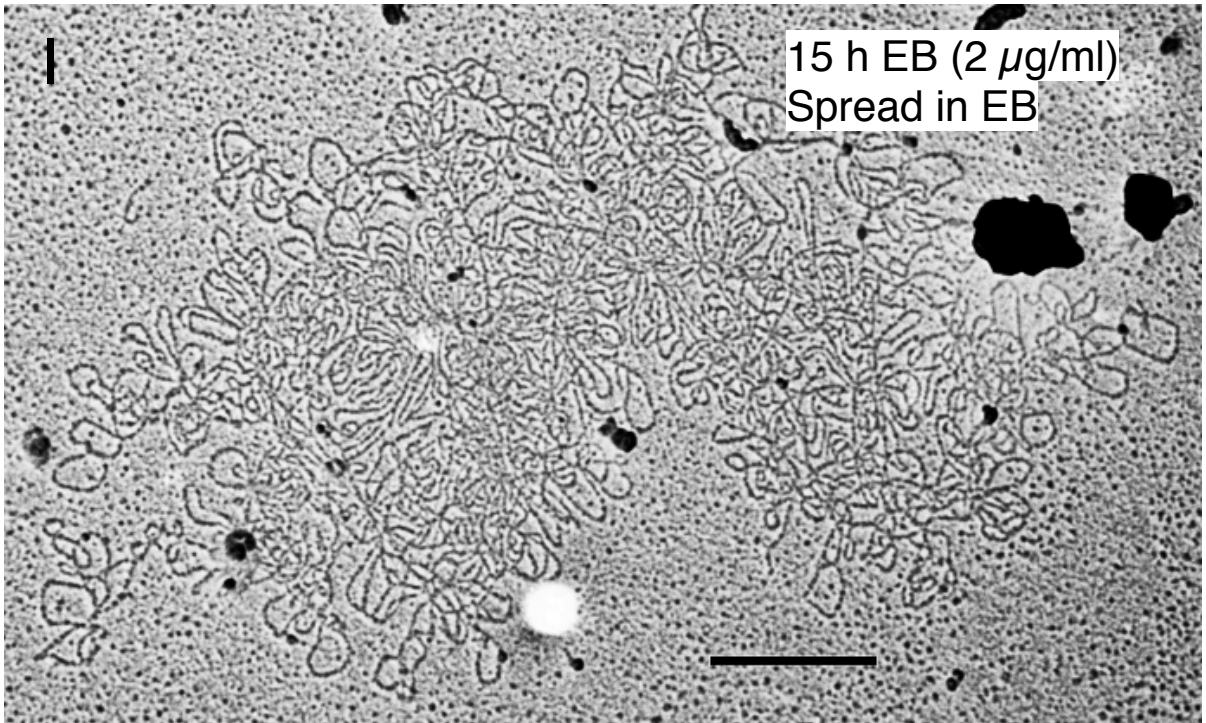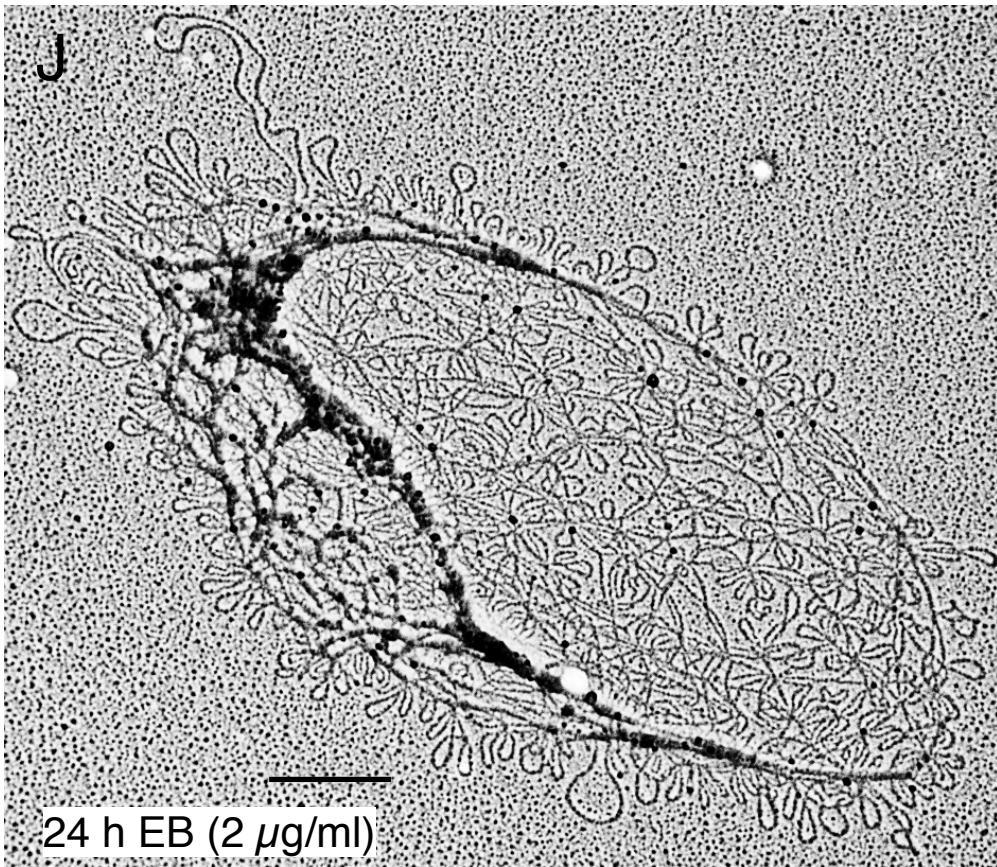

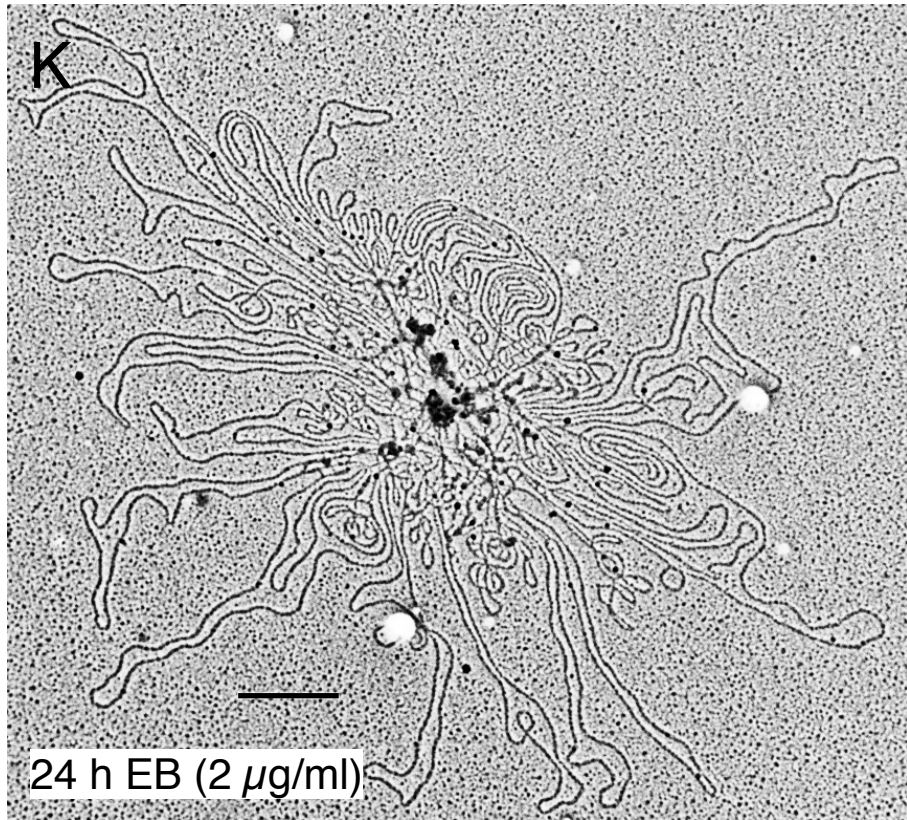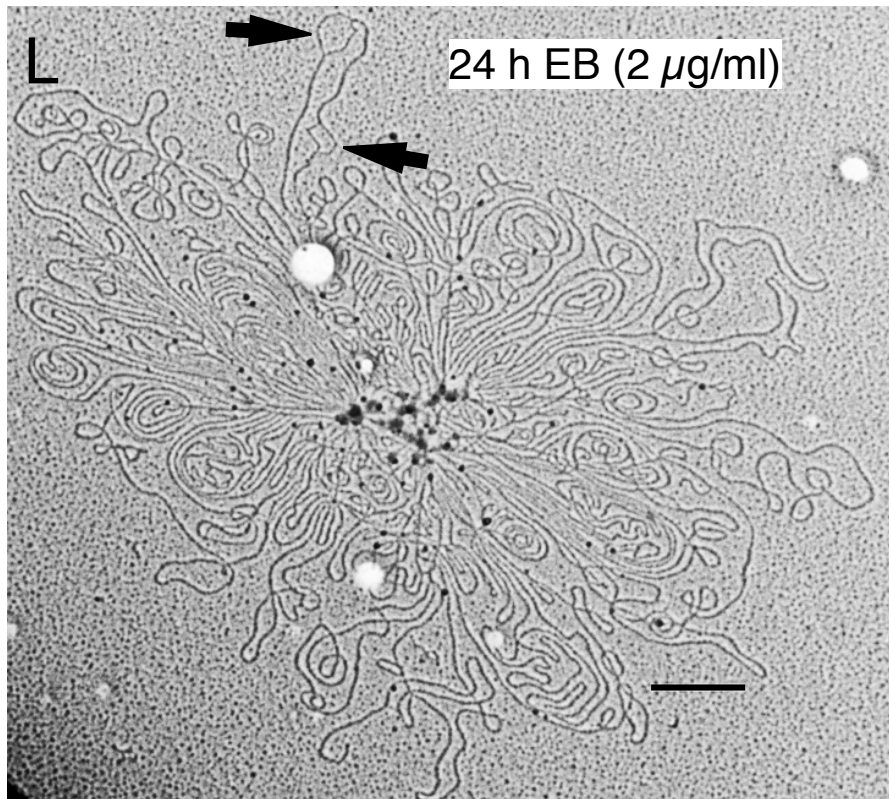

M

24 h EB (2  $\mu\text{g/ml}$ )  
Spread in EB

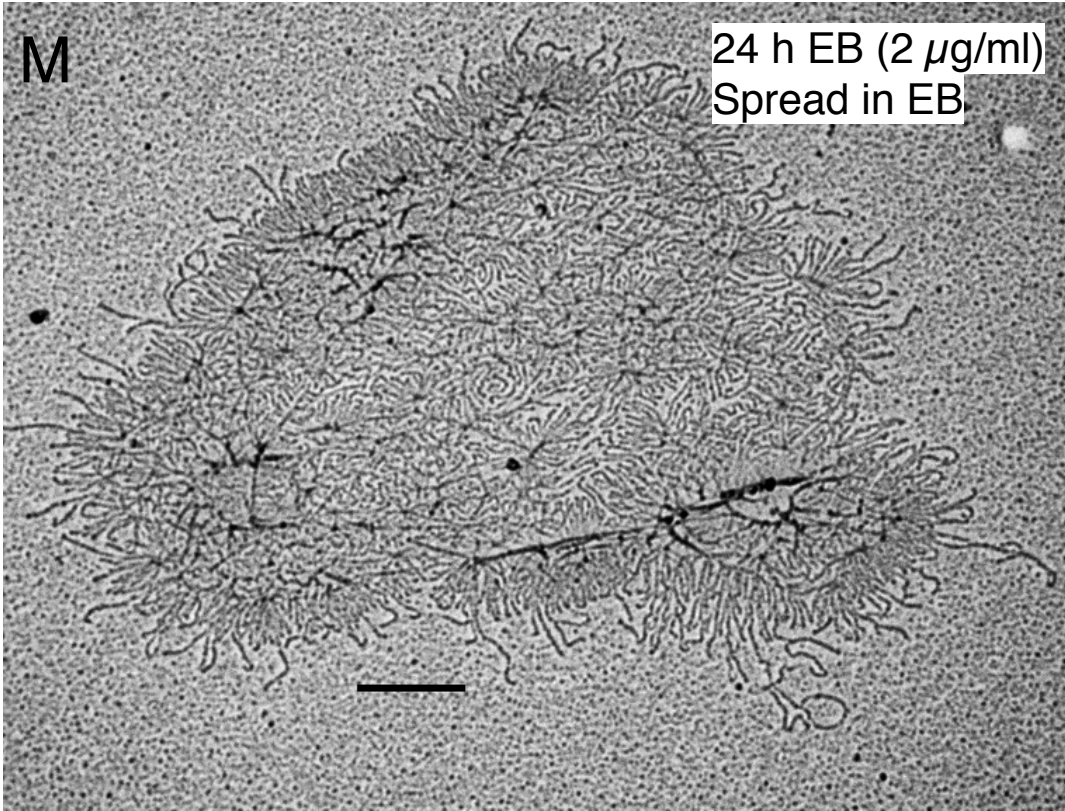

Supplement: ppat.1001226.s003.pdf [file ppat.1001226.s003.pdf]
